# Supplementary material for: Driving a NiTiO3photocatalyst for the oxygen evolution reaction with near-infrared light
Source: Royal Society of Chemistry journal article supplement (doi:10.1039/d3dt01527k), 2023-01-01
Supplement: d3dt01527k1.pdf [file d3dt01527k1.pdf]

## *Supporting Information*

### Driving NiTiO<sub>3</sub> Photocatalyst for Oxygen Evolution Reaction with Near-infrared Light

Long Wang,<sup>a</sup> Lingyi Zhuang,<sup>a</sup> Sibowang,<sup>a</sup> Qiao Chen<sup>b</sup> and Yuanxing  
Fang<sup>a\*</sup>

<sup>a</sup>State Key Laboratory of Photocatalysis on Energy and Environment, College of  
Chemistry, Fuzhou University, Fuzhou 350002, P. R. China.

<sup>b</sup>Department of Chemistry, School of Life Sciences, University of Sussex, Brighton,  
BN1 9QJ, United Kingdom

Email: [yxfang@fzu.edu.cn](mailto:yxfang@fzu.edu.cn)

## **Experimental Section**

### **Materials of the synthesis**

Nickel (II) acetate tetrahydrate  $[\text{Ni}(\text{CH}_3\text{COO})_2 \cdot 4\text{H}_2\text{O}]$  and titanium (IV) isopropoxide  $[\text{C}_{12}\text{H}_{28}\text{O}_4\text{Ti}]$  were purchased from Aladdin Bio-Chem Technology Co., Ltd, Shanghai, China. Anhydrous citric acid  $[\text{C}_6\text{H}_8\text{O}_7]$ , Cobaltous nitrate hexahydrate  $[\text{Co}(\text{NO}_3)_2 \cdot 6\text{H}_2\text{O}]$ , and anhydrous ethyl alcohol  $[\text{C}_2\text{H}_5\text{OH}]$  were purchased from Sinopharm Chemical Reagent Co., China. The chemicals were used as received without any purification. Deionized (DI) water was utilized in the experiment.

### **Synthesis of $\text{NiTiO}_3$ photocatalyst**

$\text{NiTiO}_3$  (NTO) was synthesized via a modified Pechini method (including sol-gel and calcination). In detail, 2.488 g  $\text{Ni}(\text{CH}_3\text{COO})_2 \cdot 4\text{H}_2\text{O}$  and 11.53 g  $\text{C}_6\text{H}_8\text{O}_7$  were dissolved in 100 mL  $\text{C}_2\text{H}_5\text{OH}$  under constant stirring for 30 minutes to form a homogeneous solution. Afterward, 2.96 mL  $\text{C}_{12}\text{H}_{28}\text{O}_4\text{Ti}$  was added to the solution dropwise while stirring in ambient conditions for an hour. The as-prepared solution was transferred into an oven and thermally heated at 343 K for 2 days at a 5 K/min ramping rate to form a gel-like precursor. The gel was calcined at 873 K for 4 hours with the ramping rate of 5 K/min and cooling down to ambient conditions to obtain NTO powder.

### **Synthesis of $\text{CoO}_x$ loaded $\text{NiTiO}_3$ photocatalyst**

$\text{CoO}_x$  was deposited onto the surface of NTO by the “impregnation-sintering” method.  $\text{Co}(\text{NO}_3)_2 \cdot 6\text{H}_2\text{O}$  was used as the cobalt source and was firstly dissolved into DI water to form a 5 mg/mL solution. After that, a certain amount of Co solution was added to a beaker containing 200 mg of NTO powder. Through sonication and magnetic stirring, the mixed composite was dried by water-boiling. Finally, the powder was sintered in a muffle furnace at 623 K for 1 hour with a ramping rate of 5 K/min and cooling to ambient conditions. The composite photocatalyst was denoted as  $x\text{CNTO}$ , where x stands for the weight percentage of  $\text{CoO}_x$ , varying from 1%, 2%, 3%, and 4% to 5%, respectively.

### **Characterizations of materials**

X-ray diffraction (XRD) patterns were measured in a Rigaku Miniflex 600 diffractometer with Cu-K $\alpha$ 1 radiation (1.54178 Å). UV-Vis diffuse reflectance spectra (UV-Vis DRS) were obtained in a Perkin Elmer Lambda 950 scan system. Raman spectra were collected on a LabRAM HR Evolution Raman spectrometer system under 325 nm excitation. The morphologies of the sample were obtained by a Hitachi New Generation SU8010 field emission scanning electron microscopy (FESEM). X-ray photoelectron spectroscopy (XPS) was performed on a Thermo ESCALAB250 instrument with a monochromatized AL K $\alpha$  line source (200W). Temperature-dependent photoluminescence (PL) was obtained using a steady state and time-resolved fluorescence spectrometers (FLSP920). Photoelectrochemical tests were conducted in an electrochemical workstation (CHI-750D, Shanghai Chenhua, China) with a three-electrode system, using Pt foil as the counter electrode and Ag/AgCl (3 M KCl) electrode as the reference electrode. The working electrode was prepared on fluorine-doped tin oxide (FTO), where a mixed NTO and DMF were spread and dried. Nyquist plots and Mott-Schottky measurements were obtained using the electronic impedance spectroscopy (EIS) system in 0.2 M Na<sub>2</sub>SO<sub>4</sub> solution (pH value ~ 6.8). The ultrafast fs-TA measurements were conducted under a pump wavelength of 360 nm on Helios (Ultrafast System) spectrometers using a regeneratively amplified femtosecond Ti:sapphire laser system (Spitfire Pro-F1KXP, Spectra-Physics).

### **Photocatalytic oxygen evolution reaction**

The photocatalytic water oxidation reactions were performed in a Pyrex top-irradiation reaction vessel (200 mL). Typically, 50 mg catalyst was dispersed into a reactor containing 100 mL water, followed by adding 1 mM AgNO<sub>3</sub> and 0.2 g La<sub>2</sub>O<sub>3</sub> as an electron sacrificial agent and a pH buffer agent, respectively. Before light illumination, the whole system was evacuated for 30 min to exhaust the air. A 300 W Xe lamp was used as the light source for photocatalytic half-water oxidation and reduction reactions. Various LED lights (50 W) with different wavelengths were also applied to the experiments. A water-circulating pump controlled the temperature of the reaction system at 12°C. The evolved O<sub>2</sub> was detected by online gas chromatography (SHIMADZU GC 8A) equipped with a thermal conductivity detector and Ar as carrier

gas.

### **Apparent quantum yield (AQY) measurements**

The AQY was calculated by the following formula:

$$AQY (\%) = \frac{N_e}{N_p} \times 100\% = \frac{4n_{O_2,t}N_Ahc}{PS\lambda_{inc}t} \times 100\%$$

Where  $N_e$  is the number of reaction electrons,  $N_p$  is the incident photons,  $n_{O_2,t}$  (mol) is the amount of oxygen evolution,  $N_A$  is Avogadro's constant,  $h$  (m<sup>2</sup> kg/s) is the Planck constant,  $c$  (m/s) is the power density of the incident monochromatic light,  $S$  (m<sup>2</sup>) is the irradiation area,  $\lambda_{inc}$  (m) is the wavelength of the incident monochromatic light, and  $t$  (s) is the duration of incident light exposure.

## Figure Legends

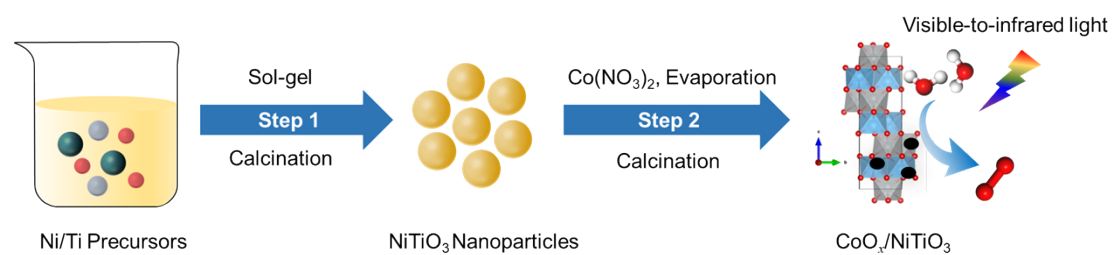

**Scheme S1.** Schematic illustration of the synthesis of CNTO photocatalyst.

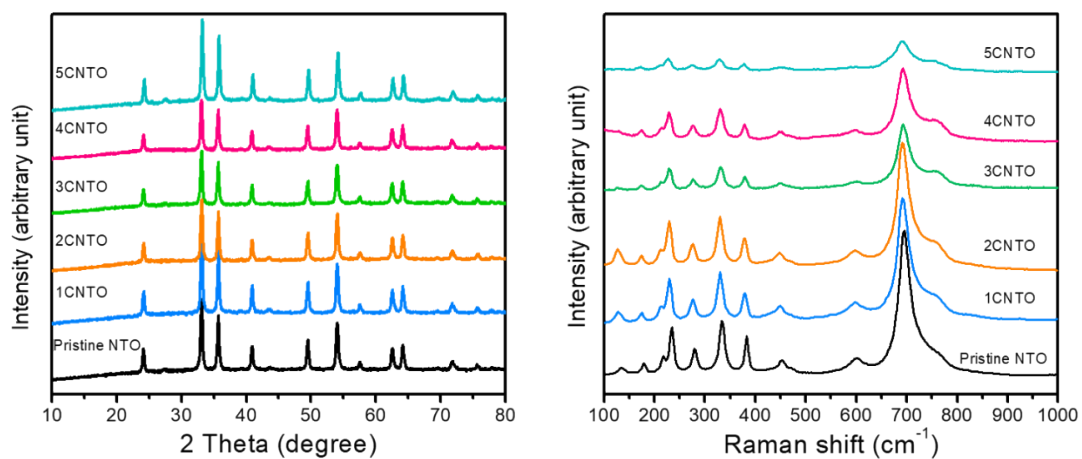

**Figure S1.** (a) XRD patterns and (b) Raman spectra of NTO and CNTO materials.

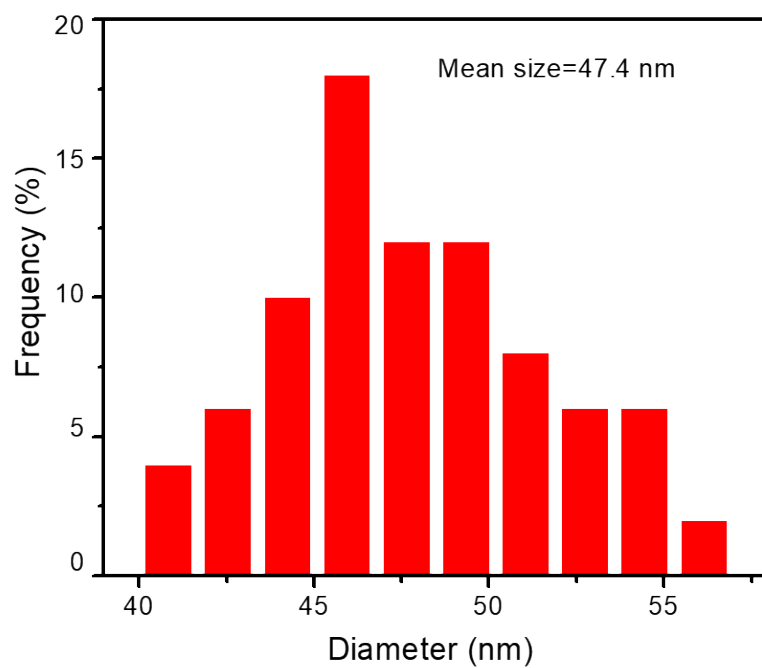

**Figure S2.** The size distribution of 4CNTO photocatalyst.

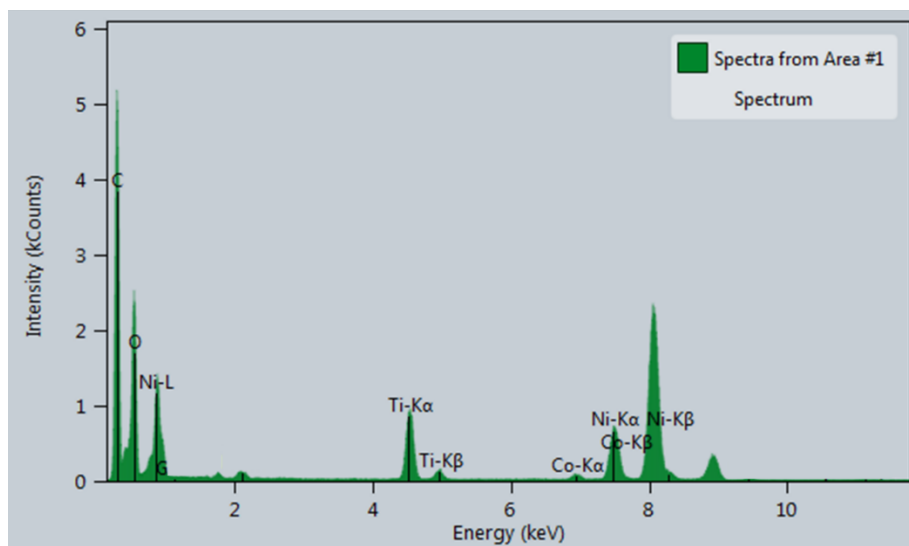

**Figure S3.** EDX elemental signals of 4CNTO.



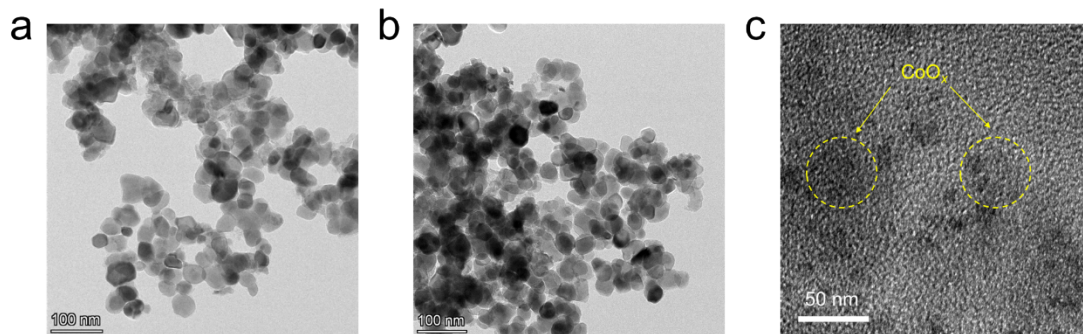

**Figure S4.** TEM images of (a) for NTO, (b) and (c) for 4CNTO.

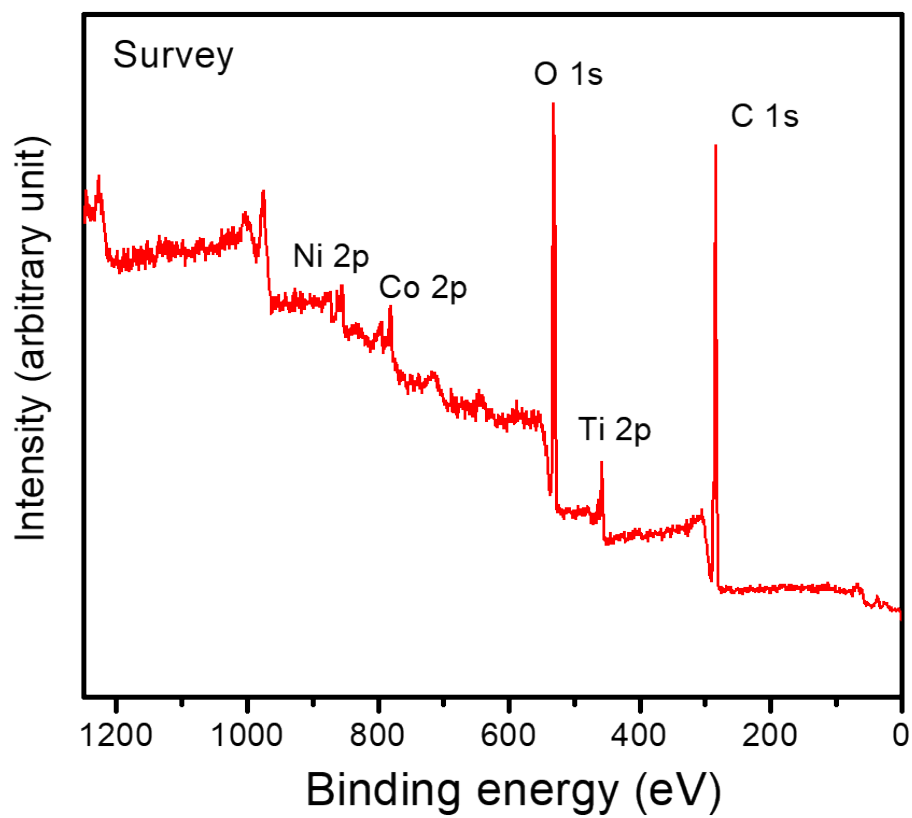

**Figure S5.** Survey XPS spectrum of 4CNTO.

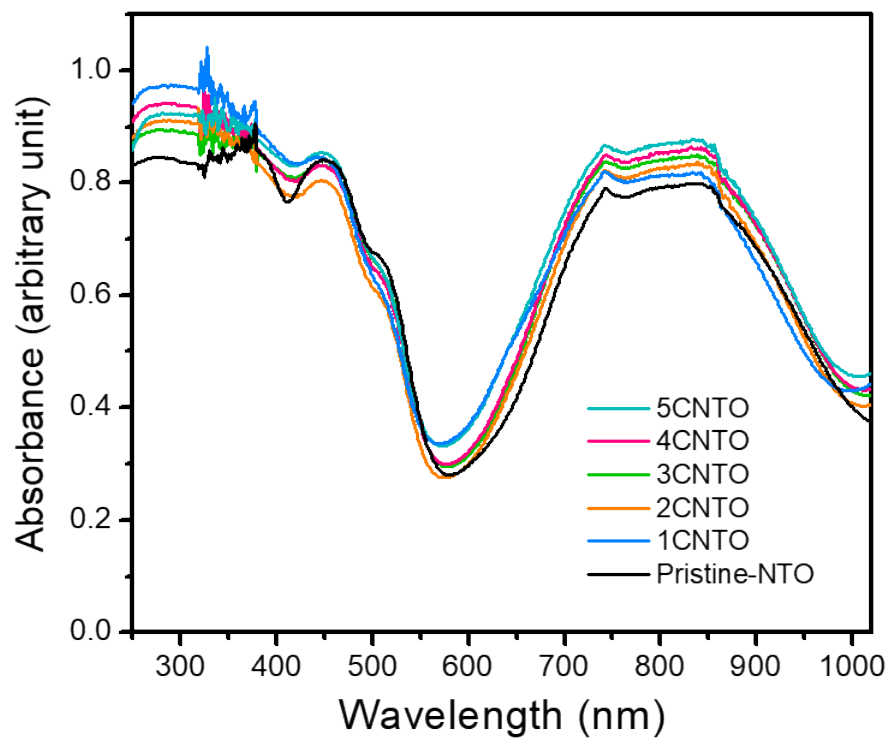

**Figure S6.** UV-Vis DRS spectra of NTO and CNTO series with the loading of different  $\text{CoO}_x$  weights.

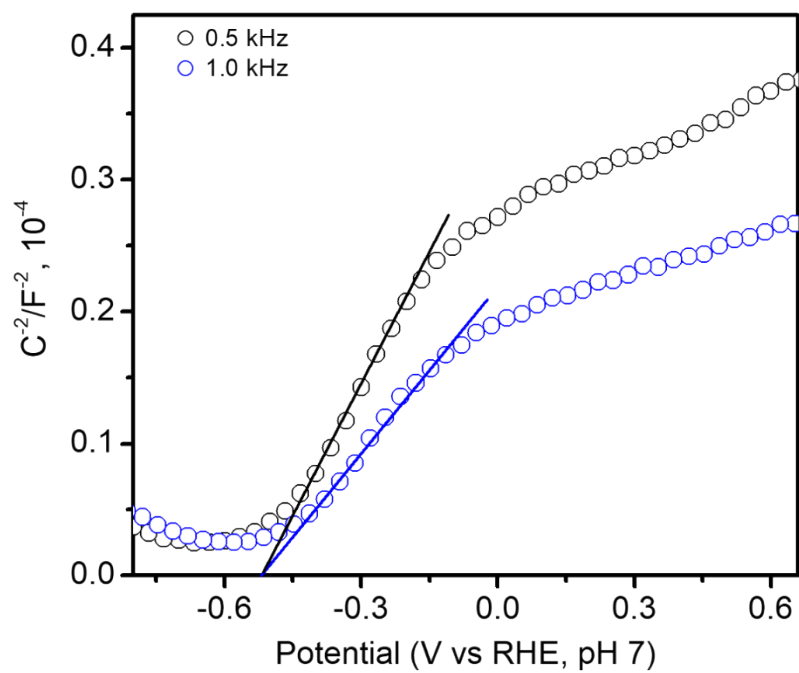

**Figure S7.** Mott-Schottky plots of NTO under different frequencies.

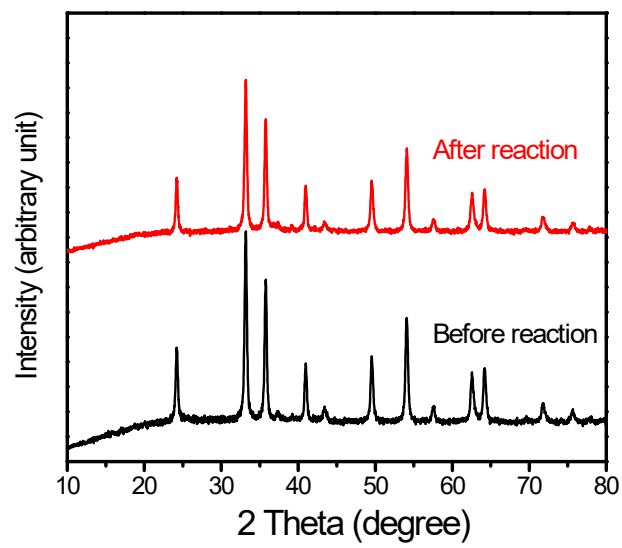

**Figure S8.** The before and after-reaction XRD patterns of the 4CNTO.

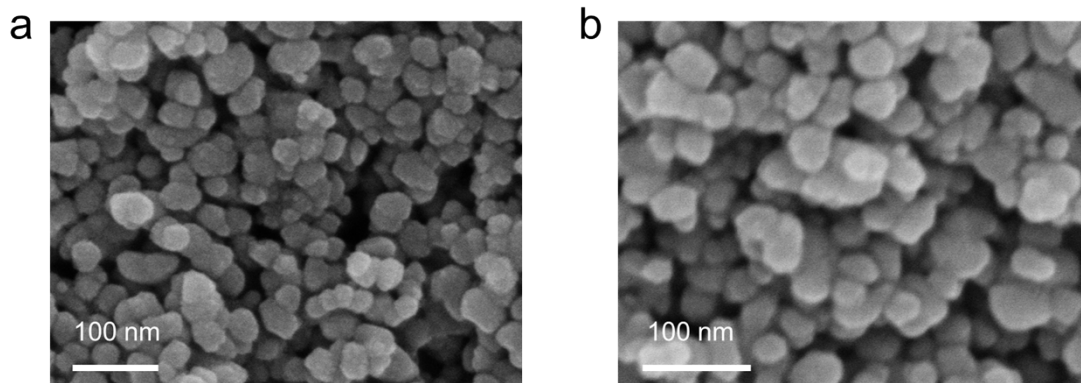

**Figure S9.** SEM images of 4CNTO for before (a) and after-reaction (b).

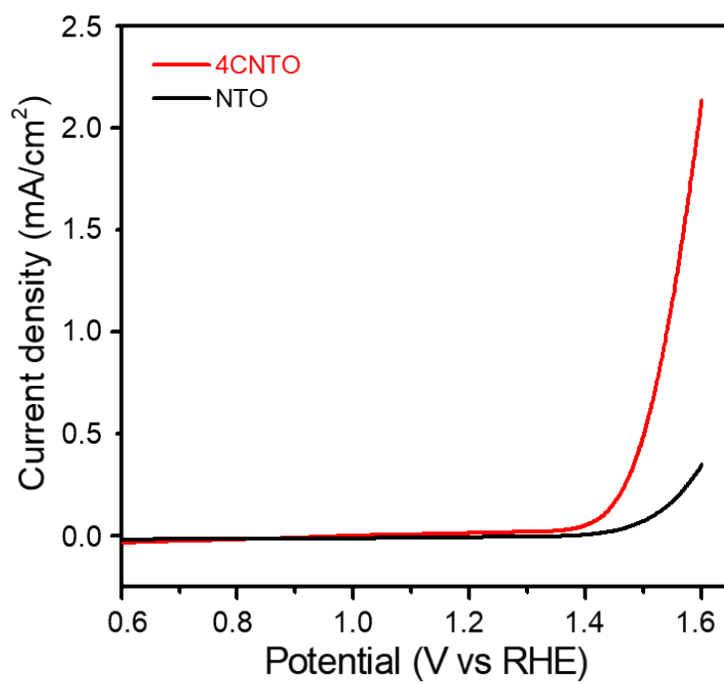

**Figure S10.** LSV curves of NTO and 4CNTO.

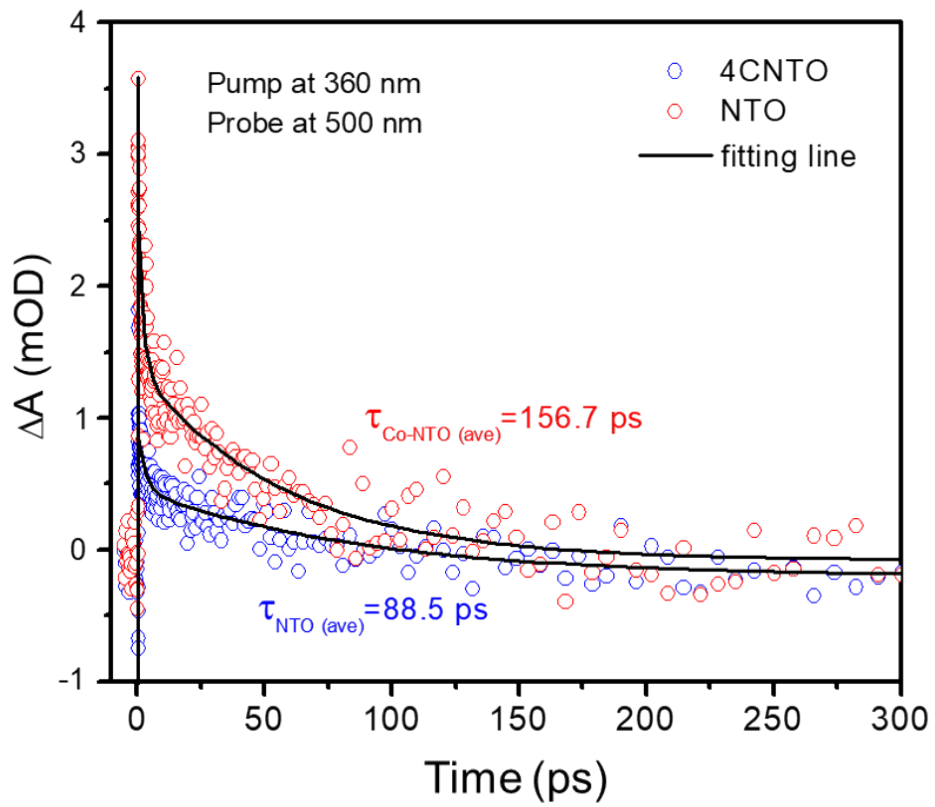

**Figure S11.** Time profiles of 4CNTO and NTO of kinetics decay.
